# Supplementary material for: Carbapenem Combinations for Infections Caused by Carbapenemase-Producing Pseudomonas aeruginosa: Experimental In Vitro and In Vivo Analysis
Source: MDPI journal article supplement (doi:10.3390/antibiotics11091212), 2022-09-07
Supplement: s1 [file s1]

Supplementary Figure S1. Time-kill curves at 1xMIC of dual carbapenem combination against seven carbapenemase-producing *P. aeruginosa*.

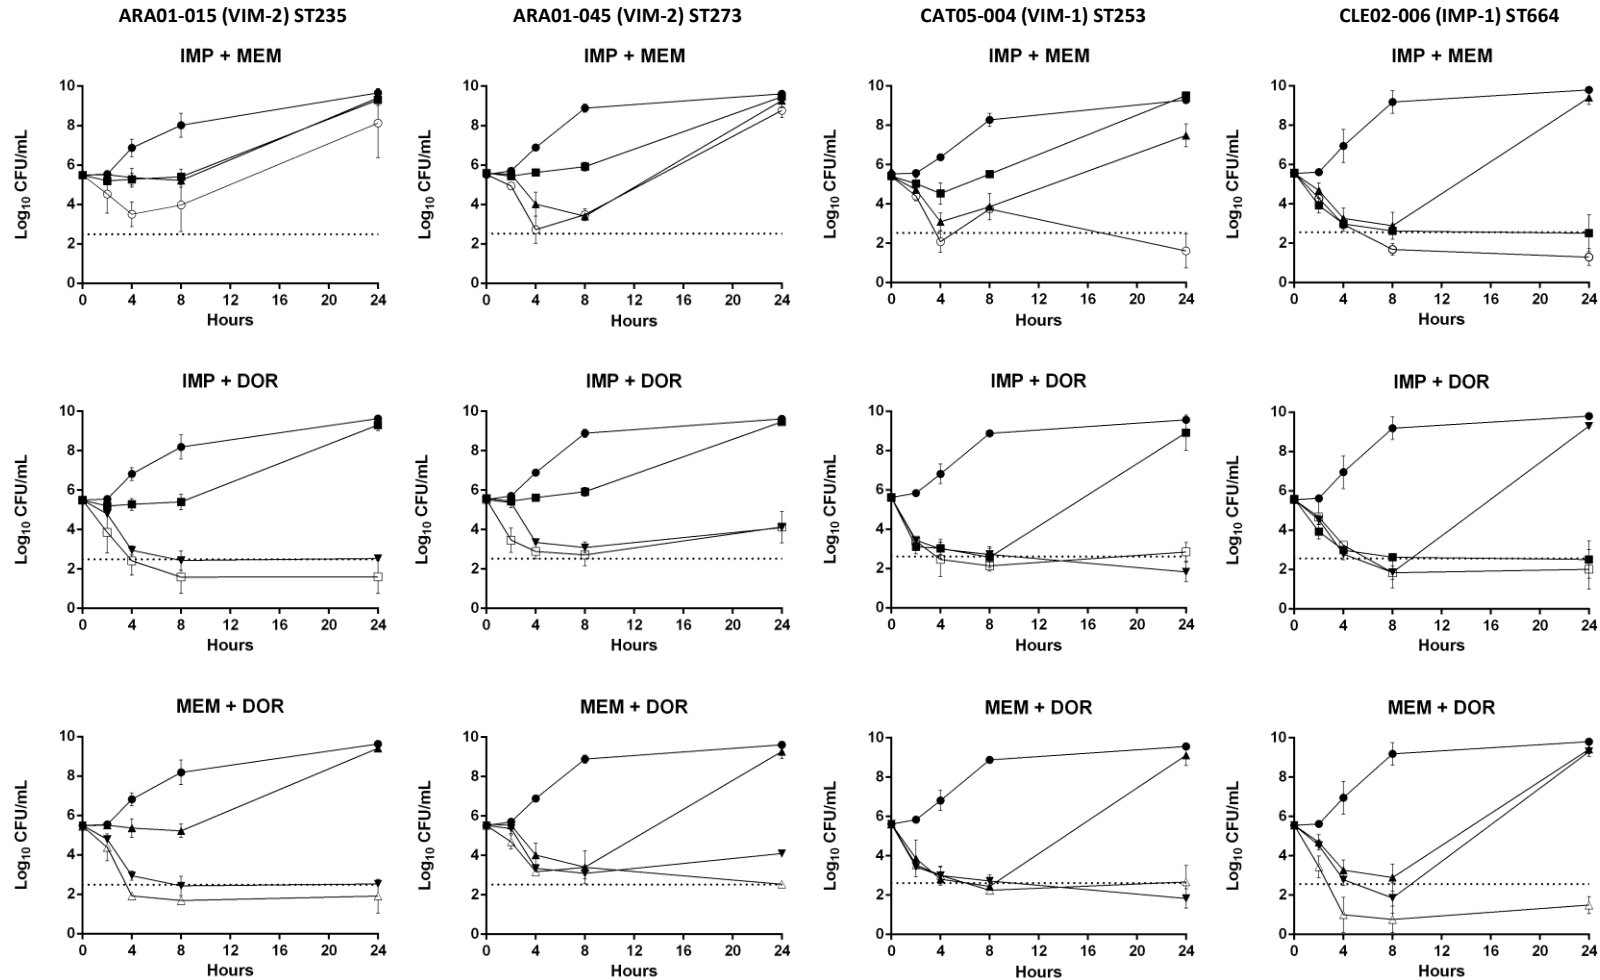

MAD02-005 (GES-5) ST175

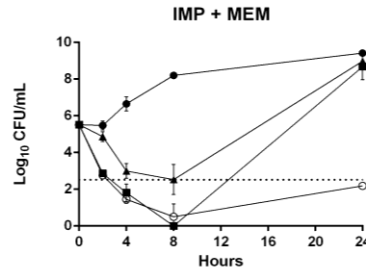

MAD04-041 (IMP-8) ST155

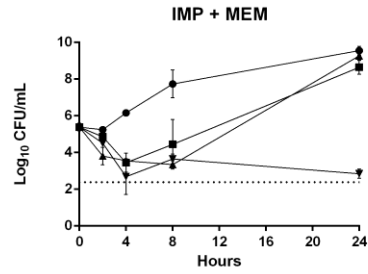

MAD05-041 (VIM-2) ST111

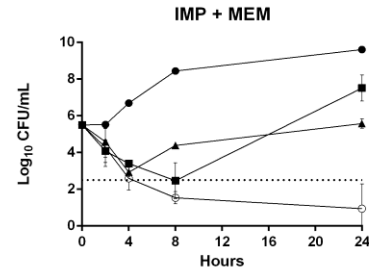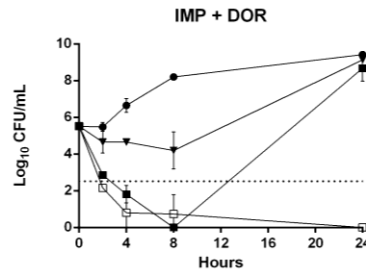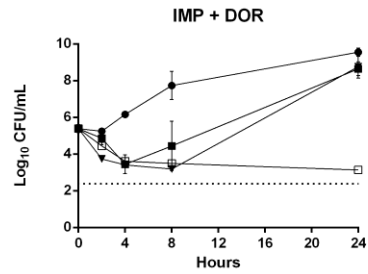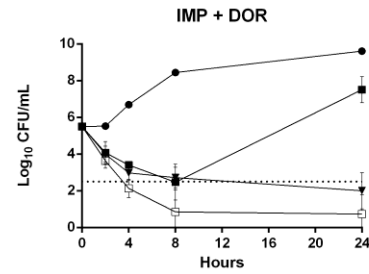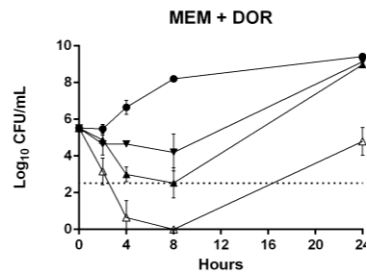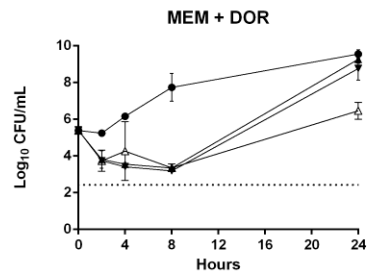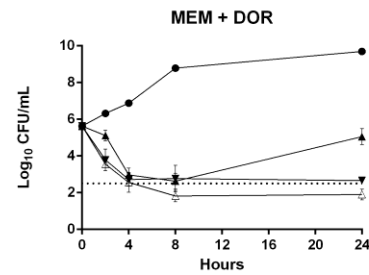

Solid circle: growth control; Square: imipenem (IMP); Triangle: meropenem (MEM); Inverted triangle: doripenem (DOR); Empty circle: IMP + MEM; Empty square: IMP + DOR; Empty triangle: MEM + DOR; Dotted line: bactericidal activity.
